# Supplementary material
Source: PubMed Central journal article supplement (PMC7686980)

Supplementary Figure. The gating strategy depicted was used in all flow cytometric analyses.

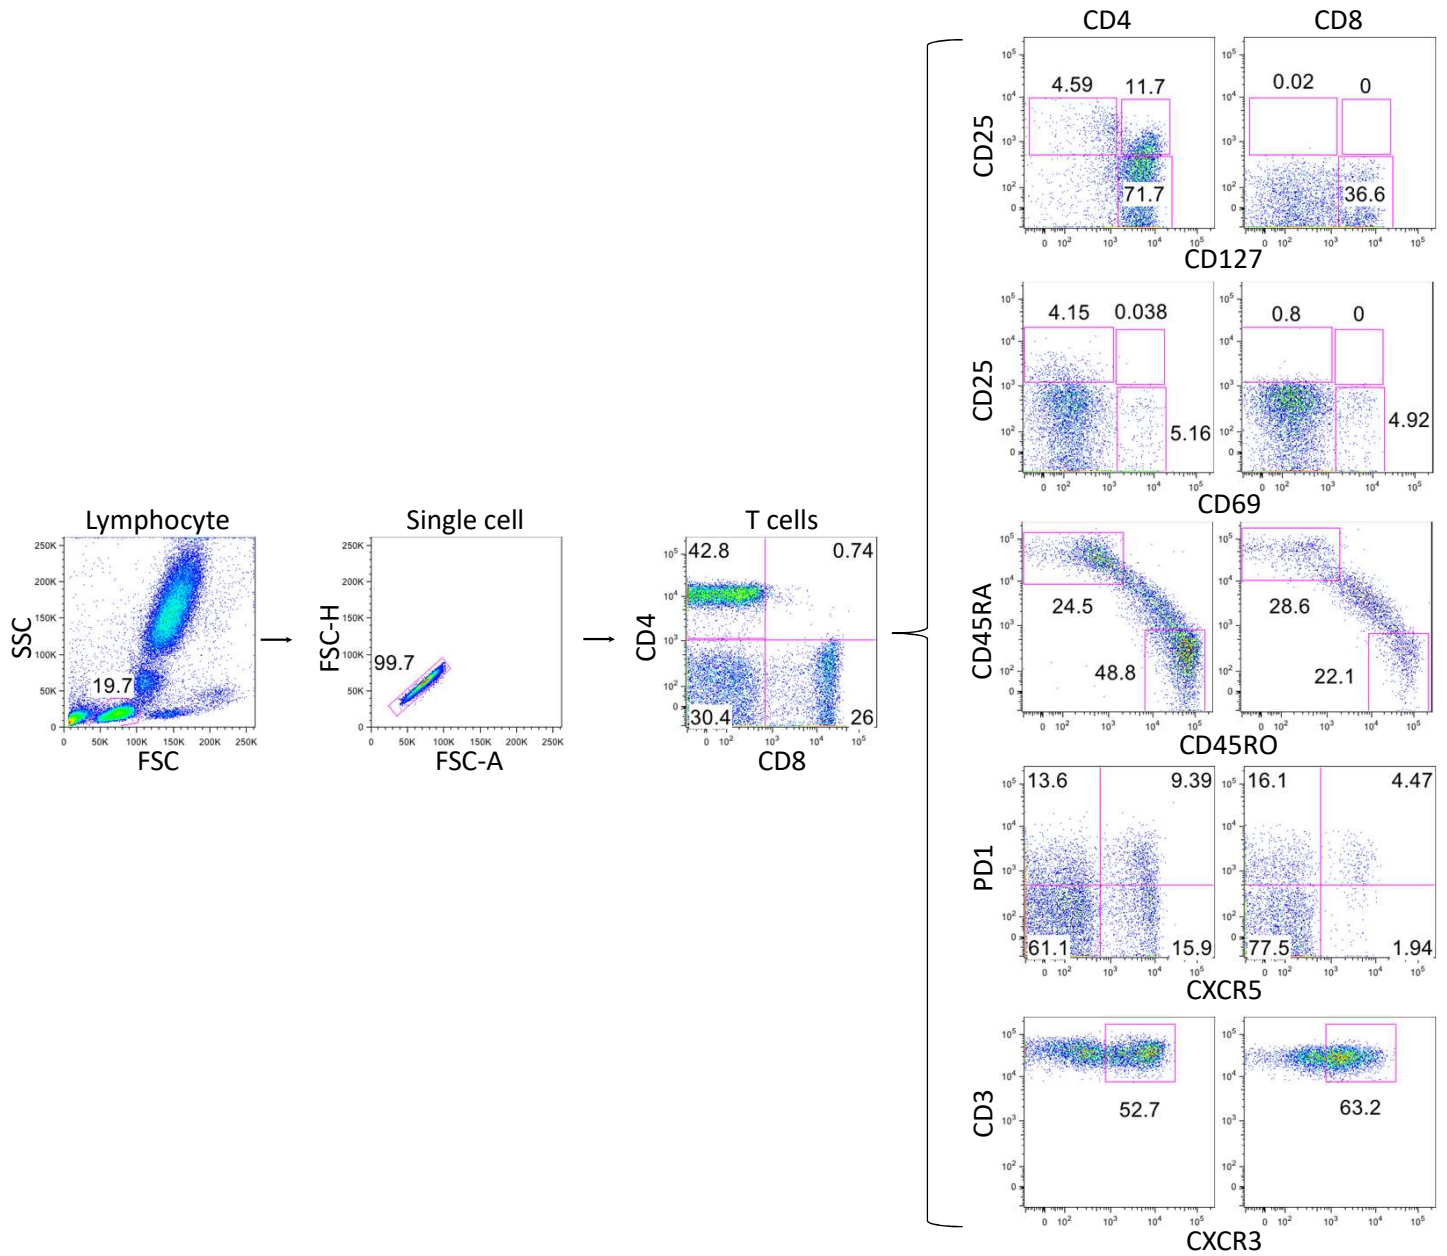

Supplement: JCMM-24-12457-s001.pdf [file JCMM-24-12457-s001.pdf]
